# Supplementary material
Source: PubMed Central journal article supplement (PMC2844180)

## **SUPPLEMENTAL FIGURE LEGEND**

Supplementary Fig 1. The effects of addition of DOX or 4-OHT on FL5.12 parental cells. The experiments were performed as described in Experimental Procedures. FL5.12 parental cells were cultured in media only, or in the presence of DOX (1  $\mu\text{g/ml}$ ) or 4-OHT (100 nM) for 36 hrs. *A.* Glucose uptake was measured. Note the addition of the DOX or 4-OHT slightly decreased glucose uptake in FL5.12 parental cells. *B.* Cell viability was measured by PI exclusion at indicated times. Note the addition of DOX or 4-OHT had little or virtually no effect on cell death in responses to 2-DG and OG treatments.

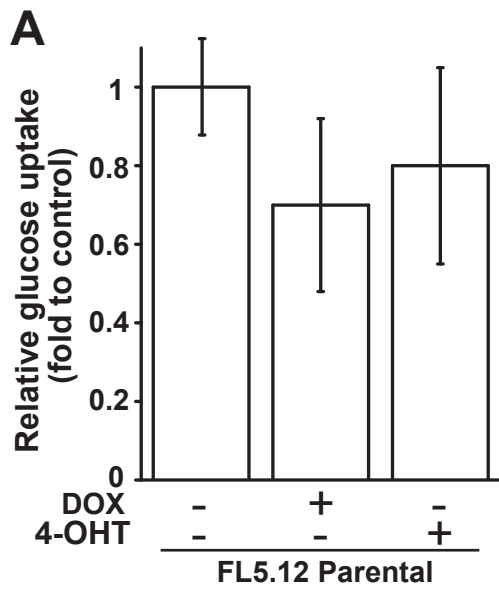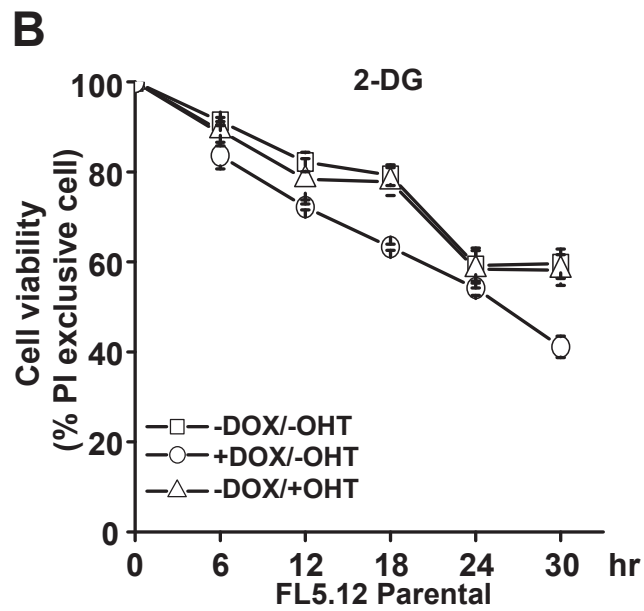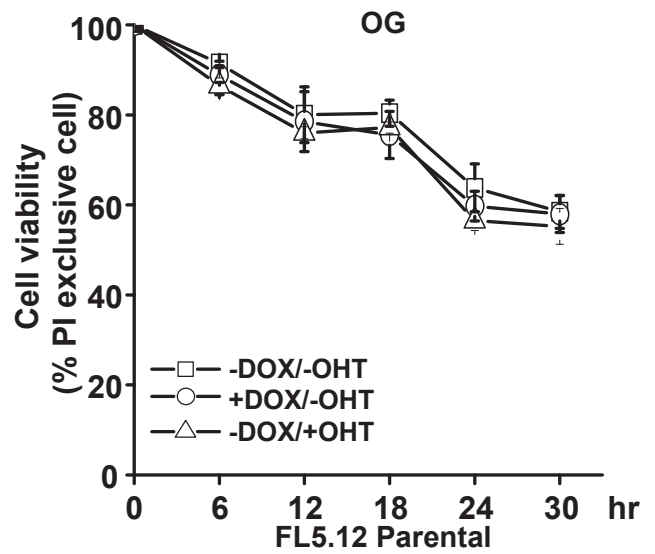

Supplement: supp_M109.035584_jbc.M109.035584-1.pdf [file supp_M109.035584_jbc.M109.035584-1.pdf]
